# Supplementary material for: Structure of the connexin-43 gap junction channel in a putative closed state
Source: eLife journal article supplement (doi:10.7554/elife.87616), 2023-05-23
Supplement: fig1-figsupp2-data1 [file Figure 1 - figure supplement 2 - source data 1.xlsx]

## Sheet: Sheet1
Panel B
Chrom.1
0	0.893332
0.001	0.969316
0.002	1.03587
0.003	1.10132
0.004	1.16379
0.005	1.22394
0.006	1.28469
0.007	1.34483
0.008	1.40068
0.009	1.45511
0.01	1.50622
0.011	1.55798
0.012	1.61008
0.013	1.66414
0.014	1.70887
0.015	1.68953
0.016	1.53049
0.017	1.2799
0.018	1.05835
0.019	0.887167
0.02	0.75481
0.021	0.634424
0.022	0.534632
0.023	0.446003
0.024	0.416923
0.025	0.411095
0.026	0.385369
0.027	0.35132
0.028	0.314029
0.029	0.272559
0.03	0.236614
0.031	0.202689
0.032	0.169647
0.033	0.137485
0.034	0.104121
0.035	0.0703924
0.036	0.0369223
0.037	0.00579381
0.038	-0.028017
0.039	-0.061369
0.04	-0.0914116
0.041	-0.119699
0.042	-0.159601
0.043	-0.197757
0.044	-0.233242
0.045	-0.26396
0.046	-0.287624
0.047	-0.310358
0.048	-0.337375
0.049	-0.398834
0.05	-0.458223
0.051	-0.493458
0.052	-0.512523
0.053	-0.52318
0.054	-0.532019
0.055	-0.549056
0.056	-0.56325
0.057	-0.57715
0.058	-0.587142
0.059	-0.595923
0.06	-0.60411
0.061	-0.611333
0.062	-0.620731
0.063	-0.628744
0.064	-0.6366
0.065	-0.644158
0.066	-0.651386
0.067	-0.659438
0.068	-0.667451
0.069	-0.675482
0.07	-0.684619
0.071	-0.693452
0.072	-0.701653
0.073	-0.704667
0.074	-0.705885
0.075	-0.7078
0.076	-0.708407
0.077	-0.707843
0.078	-0.710449
0.079	-0.710459
0.08	-0.707443
0.081	-0.708439
0.082	-0.709877
0.083	-0.713745
0.084	-0.716235
0.085	-0.717135
0.086	-0.719976
0.087	-0.724324
0.088	-0.728994
0.089	-0.735779
0.09	-0.741201
0.091	-0.74634
0.092	-0.749051
0.093	-0.753373
0.094	-0.756423
0.095	-0.759355
0.096	-0.761228
0.097	-0.764481
0.098	-0.768675
0.099	-0.773787
0.1	-0.778862
0.101	-0.784506
0.102	-0.793618
0.103	-0.803189
0.104	-0.813491
0.105	-0.822222
0.106	-0.82769
0.107	-0.830015
0.108	-0.830882
0.109	-0.831163
0.11	-0.833169
0.111	-0.833062
0.112	-0.833272
0.113	-0.834228
0.114	-0.832467
0.115	-0.830755
0.116	-0.828253
0.117	-0.826055
0.118	-0.824238
0.119	-0.822968
0.12	-0.822015
0.121	-0.821605
0.122	-0.81992
0.123	-0.817989
0.124	-0.81512
0.125	-0.811788
0.126	-0.807748
0.127	-0.800857
0.128	-0.794314
0.129	-0.789867
0.13	-0.785094
0.131	-0.781353
0.132	-0.778861
0.133	-0.778943
0.134	-0.779298
0.135	-0.780474
0.136	-0.780712
0.137	-0.779604
0.138	-0.776955
0.139	-0.777802
0.14	-0.778363
0.141	-0.781477
0.142	-0.782908
0.143	-0.78101
0.144	-0.780718
0.145	-0.777877
0.146	-0.776023
0.147	-0.77292
0.148	-0.771809
0.149	-0.770911
0.15	-0.771725
0.151	-0.770497
0.152	-0.7715
0.153	-0.77142
0.154	-0.767867
0.155	-0.765082
0.156	-0.763167
0.157	-0.760593
0.158	-0.757222
0.159	-0.755097
0.16	-0.75269
0.161	-0.751737
0.162	-0.752152
0.163	-0.752183
0.164	-0.749883
0.165	-0.748494
0.166	-0.744583
0.167	-0.742018
0.168	-0.742017
0.169	-0.742532
0.17	-0.74383
0.171	-0.744469
0.172	-0.746905
0.173	-0.748421
0.174	-0.750401
0.175	-0.751598
0.176	-0.754401
0.177	-0.756753
0.178	-0.761043
0.179	-0.767116
0.18	-0.772535
0.181	-0.777109
0.182	-0.781794
0.183	-0.785936
0.184	-0.78843
0.185	-0.79064
0.186	-0.79329
0.187	-0.793308
0.188	-0.79551
0.189	-0.796919
0.19	-0.799504
0.191	-0.802678
0.192	-0.806631
0.193	-0.808196
0.194	-0.810091
0.195	-0.810645
0.196	-0.811416
0.197	-0.811556
0.198	-0.812607
0.199	-0.812832
0.2	-0.813051
0.201	-0.814499
0.202	-0.815921
0.203	-0.81458
0.204	-0.812375
0.205	-0.811032
0.206	-0.810462
0.207	-0.808556
0.208	-0.807966
0.209	-0.80624
0.21	-0.802697
0.211	-0.800215
0.212	-0.797286
0.213	-0.794987
0.214	-0.79409
0.215	-0.790616
0.216	-0.789124
0.217	-0.785305
0.218	-0.782888
0.219	-0.781344
0.22	-0.779439
0.221	-0.778609
0.222	-0.778085
0.223	-0.776967
0.224	-0.775808
0.225	-0.775873
0.226	-0.774207
0.227	-0.772748
0.228	-0.771889
0.229	-0.771612
0.23	-0.770223
0.231	-0.767827
0.232	-0.768029
0.233	-0.766223
0.234	-0.766574
0.235	-0.766218
0.236	-0.765259
0.237	-0.766645
0.238	-0.767379
0.239	-0.767112
0.24	-0.768844
0.241	-0.770276
0.242	-0.771146
0.243	-0.7731
0.244	-0.77172
0.245	-0.772541
0.246	-0.771812
0.247	-0.77124
0.248	-0.770005
0.249	-0.770089
0.25	-0.768908
0.251	-0.766274
0.252	-0.762753
0.253	-0.76103
0.254	-0.758741
0.255	-0.758795
0.256	-0.757856
0.257	-0.756352
0.258	-0.755674
0.259	-0.754178
0.26	-0.753529
0.261	-0.753801
0.262	-0.752931
0.263	-0.752421
0.264	-0.752133
0.265	-0.7521
0.266	-0.753012
0.267	-0.752309
0.268	-0.751047
0.269	-0.752327
0.27	-0.751314
0.271	-0.750869
0.272	-0.749908
0.273	-0.749193
0.274	-0.746739
0.275	-0.744593
0.276	-0.744696
0.277	-0.745632
0.278	-0.745172
0.279	-0.745572
0.28	-0.744966
0.281	-0.745061
0.282	-0.744181
0.283	-0.74368
0.284	-0.742507
0.285	-0.7417
0.286	-0.741194
0.287	-0.740412
0.288	-0.739134
0.289	-0.737537
0.29	-0.734519
0.291	-0.728639
0.292	-0.724869
0.293	-0.72389
0.294	-0.723598
0.295	-0.724432
0.296	-0.725833
0.297	-0.727012
0.298	-0.728227
0.299	-0.729315
0.3	-0.730666
0.301	-0.731858
0.302	-0.732032
0.303	-0.733565
0.304	-0.734105
0.305	-0.734818
0.306	-0.735407
0.307	-0.736779
0.308	-0.736891
0.309	-0.738575
0.31	-0.741022
0.311	-0.743717
0.312	-0.745544
0.313	-0.748383
0.314	-0.7513
0.315	-0.755344
0.316	-0.759019
0.317	-0.761076
0.318	-0.760259
0.319	-0.758946
0.32	-0.757513
0.321	-0.757801
0.322	-0.758752
0.323	-0.760693
0.324	-0.760023
0.325	-0.761564
0.326	-0.763192
0.327	-0.765096
0.328	-0.765545
0.329	-0.767548
0.33	-0.768135
0.331	-0.76848
0.332	-0.770402
0.333	-0.77229
0.334	-0.773426
0.335	-0.773154
0.336	-0.770911
0.337	-0.769906
0.338	-0.769661
0.339	-0.76759
0.34	-0.766298
0.341	-0.76469
0.342	-0.764523
0.343	-0.767982
0.344	-0.769532
0.345	-0.768429
0.346	-0.76678
0.347	-0.766111
0.348	-0.767021
0.349	-0.768622
0.35	-0.766118
0.351	-0.764286
0.352	-0.765011
0.353	-0.769557
0.354	-0.767793
0.355	-0.770145
0.356	-0.773885
0.357	-0.776541
0.358	-0.779826
0.359	-0.783142
0.36	-0.786873
0.361	-0.791029
0.362	-0.795669
0.363	-0.797629
0.364	-0.80212
0.365	-0.805751
0.366	-0.810237
0.367	-0.814082
0.368	-0.814024
0.369	-0.816015
0.37	-0.821733
0.371	-0.825558
0.372	-0.827465
0.373	-0.826646
0.374	-0.82766
0.375	-0.832005
0.376	-0.834115
0.377	-0.833136
0.378	-0.830516
0.379	-0.832858
0.38	-0.833199
0.381	-0.830532
0.382	-0.8283
0.383	-0.825819
0.384	-0.82427
0.385	-0.822887
0.386	-0.820619
0.387	-0.819322
0.388	-0.8189
0.389	-0.820182
0.39	-0.820434
0.391	-0.819907
0.392	-0.816512
0.393	-0.814077
0.394	-0.813581
0.395	-0.812125
0.396	-0.811593
0.397	-0.812747
0.398	-0.813496
0.399	-0.815905
0.4	-0.816913
0.401	-0.819188
0.402	-0.821868
0.403	-0.822474
0.404	-0.82348
0.405	-0.823787
0.406	-0.824914
0.407	-0.825472
0.408	-0.826133
0.409	-0.826371
0.41	-0.823404
0.411	-0.823877
0.412	-0.823042
0.413	-0.822788
0.414	-0.820368
0.415	-0.818997
0.416	-0.819084
0.417	-0.822936
0.418	-0.824912
0.419	-0.825377
0.42	-0.825177
0.421	-0.825094
0.422	-0.823213
0.423	-0.820633
0.424	-0.815804
0.425	-0.812297
0.426	-0.808991
0.427	-0.806209
0.428	-0.805305
0.429	-0.804817
0.43	-0.804982
0.431	-0.805043
0.432	-0.803625
0.433	-0.801515
0.434	-0.800627
0.435	-0.803933
0.436	-0.805587
0.437	-0.80588
0.438	-0.805279
0.439	-0.805452
0.44	-0.804622
0.441	-0.801715
0.442	-0.798026
0.443	-0.795851
0.444	-0.794634
0.445	-0.794245
0.446	-0.794002
0.447	-0.793617
0.448	-0.795014
0.449	-0.798088
0.45	-0.79981
0.451	-0.800352
0.452	-0.80214
0.453	-0.803144
0.454	-0.802794
0.455	-0.802144
0.456	-0.802663
0.457	-0.804242
0.458	-0.806707
0.459	-0.808239
0.46	-0.808002
0.461	-0.808728
0.462	-0.809199
0.463	-0.810617
0.464	-0.811802
0.465	-0.812815
0.466	-0.815835
0.467	-0.819456
0.468	-0.823095
0.469	-0.82581
0.47	-0.827318
0.471	-0.82916
0.472	-0.830699
0.473	-0.832177
0.474	-0.833057
0.475	-0.834094
0.476	-0.834936
0.477	-0.833448
0.478	-0.832505
0.479	-0.832537
0.48	-0.833906
0.481	-0.834631
0.482	-0.834657
0.483	-0.8368
0.484	-0.837503
0.485	-0.837852
0.486	-0.83797
0.487	-0.838917
0.488	-0.83988
0.489	-0.839909
0.49	-0.840516
0.491	-0.840924
0.492	-0.839845
0.493	-0.838075
0.494	-0.835945
0.495	-0.834873
0.496	-0.83444
0.497	-0.835419
0.498	-0.834665
0.499	-0.832651
0.5	-0.832616
0.501	-0.834022
0.502	-0.837589
0.503	-0.841671
0.504	-0.844182
0.505	-0.845622
0.506	-0.846966
0.507	-0.847606
0.508	-0.847784
0.509	-0.848638
0.51	-0.849972
0.511	-0.851465
0.512	-0.852498
0.513	-0.853902
0.514	-0.855276
0.515	-0.857478
0.516	-0.859994
0.517	-0.862764
0.518	-0.863951
0.519	-0.865347
0.52	-0.865589
0.521	-0.864559
0.522	-0.863567
0.523	-0.864545
0.524	-0.866793
0.525	-0.868026
0.526	-0.867278
0.527	-0.864673
0.528	-0.862679
0.529	-0.86125
0.53	-0.860392
0.531	-0.859346
0.532	-0.859958
0.533	-0.859329
0.534	-0.858737
0.535	-0.858546
0.536	-0.85881
0.537	-0.858012
0.538	-0.856315
0.539	-0.854706
0.54	-0.853593
0.541	-0.852961
0.542	-0.852327
0.543	-0.851816
0.544	-0.852331
0.545	-0.85429
0.546	-0.856486
0.547	-0.857688
0.548	-0.858533
0.549	-0.858407
0.55	-0.85714
0.551	-0.855996
0.552	-0.854908
0.553	-0.854566
0.554	-0.855778
0.555	-0.857005
0.556	-0.85662
0.557	-0.855506
0.558	-0.854626
0.559	-0.85298
0.56	-0.852148
0.561	-0.852497
0.562	-0.853818
0.563	-0.856064
0.564	-0.857176
0.565	-0.857414
0.566	-0.857525
0.567	-0.858219
0.568	-0.860368
0.569	-0.861842
0.57	-0.861633
0.571	-0.861906
0.572	-0.862542
0.573	-0.86219
0.574	-0.863396
0.575	-0.865485
0.576	-0.866613
0.577	-0.869229
0.578	-0.869766
0.579	-0.870614
0.58	-0.872633
0.581	-0.875984
0.582	-0.879083
0.583	-0.881566
0.584	-0.883675
0.585	-0.884392
0.586	-0.88474
0.587	-0.88405
0.588	-0.884127
0.589	-0.887085
0.59	-0.888889
0.591	-0.890261
0.592	-0.891489
0.593	-0.893069
0.594	-0.89442
0.595	-0.89595
0.596	-0.896564
0.597	-0.895054
0.598	-0.895596
0.599	-0.896406
0.6	-0.895908
0.601	-0.897857
0.602	-0.899564
0.603	-0.90113
0.604	-0.901899
0.605	-0.900465
0.606	-0.898623
0.607	-0.897579
0.608	-0.898289
0.609	-0.899268
0.61	-0.899293
0.611	-0.898791
0.612	-0.898741
0.613	-0.898138
0.614	-0.894932
0.615	-0.891905
0.616	-0.890046
0.617	-0.888896
0.618	-0.885822
0.619	-0.882075
0.62	-0.879791
0.621	-0.879016
0.622	-0.879316
0.623	-0.879325
0.624	-0.880425
0.625	-0.881872
0.626	-0.881859
0.627	-0.88135
0.628	-0.881664
0.629	-0.883273
0.63	-0.884996
0.631	-0.886845
0.632	-0.887771
0.633	-0.886701
0.634	-0.885935
0.635	-0.886877
0.636	-0.887285
0.637	-0.887935
0.638	-0.88894
0.639	-0.890557
0.64	-0.891389
0.641	-0.892048
0.641	-0.893231
0.642	-0.896009
0.643	-0.89856
0.644	-0.900103
0.645	-0.901899
0.646	-0.903918
0.647	-0.904768
0.648	-0.903605
0.649	-0.903328
0.65	-0.904914
0.651	-0.906439
0.652	-0.908052
0.653	-0.908158
0.654	-0.908062
0.655	-0.909378
0.656	-0.910663
0.657	-0.912681
0.658	-0.915279
0.659	-0.917839
0.66	-0.919375
0.661	-0.91977
0.662	-0.919562
0.663	-0.919225
0.664	-0.919071
0.665	-0.917694
0.666	-0.914783
0.667	-0.913235
0.668	-0.914228
0.669	-0.91454
0.67	-0.913874
0.671	-0.913705
0.672	-0.913427
0.673	-0.912124
0.674	-0.910387
0.675	-0.908364
0.676	-0.906558
0.677	-0.904407
0.678	-0.901758
0.679	-0.898984
0.68	-0.896391
0.681	-0.89418
0.682	-0.892912
0.683	-0.892388
0.684	-0.890668
0.685	-0.888968
0.686	-0.887719
0.687	-0.88728
0.688	-0.888241
0.689	-0.889909
0.69	-0.892247
0.691	-0.894196
0.692	-0.893649
0.693	-0.8927
0.694	-0.892121
0.695	-0.891481
0.696	-0.890816
0.697	-0.891426
0.698	-0.893782
0.699	-0.895242
0.7	-0.895875
0.701	-0.897961
0.702	-0.899908
0.703	-0.901682
0.704	-0.90338
0.705	-0.903451
0.706	-0.904358
0.707	-0.906582
0.708	-0.908977
0.709	-0.910467
0.71	-0.913104
0.711	-0.916866
0.712	-0.919965
0.713	-0.9222
0.714	-0.923375
0.715	-0.924874
0.716	-0.926927
0.717	-0.929925
0.718	-0.932529
0.719	-0.934776
0.72	-0.936988
0.721	-0.938627
0.722	-0.940773
0.723	-0.941527
0.724	-0.942463
0.725	-0.945063
0.726	-0.945974
0.727	-0.945928
0.728	-0.945706
0.729	-0.945215
0.73	-0.945871
0.731	-0.945157
0.732	-0.942739
0.733	-0.940321
0.734	-0.939863
0.735	-0.938884
0.736	-0.935866
0.737	-0.933414
0.738	-0.931759
0.739	-0.930658
0.74	-0.929671
0.741	-0.92923
0.742	-0.927983
0.743	-0.926038
0.744	-0.924847
0.745	-0.925424
0.746	-0.926965
0.747	-0.927925
0.748	-0.929559
0.749	-0.929915
0.75	-0.928514
0.751	-0.927544
0.752	-0.927052
0.753	-0.928563
0.754	-0.931873
0.755	-0.932376
0.756	-0.933233
0.757	-0.934706
0.758	-0.93601
0.759	-0.937197
0.76	-0.935975
0.761	-0.937066
0.762	-0.938648
0.763	-0.939394
0.764	-0.940259
0.765	-0.94185
0.766	-0.943224
0.767	-0.944357
0.768	-0.946343
0.769	-0.94749
0.77	-0.947625
0.771	-0.947055
0.772	-0.946104
0.773	-0.946033
0.774	-0.946512
0.775	-0.946451
0.776	-0.946009
0.777	-0.946713
0.778	-0.945473
0.779	-0.943954
0.78	-0.945072
0.781	-0.945508
0.782	-0.945989
0.783	-0.945986
0.784	-0.945988
0.785	-0.947459
0.786	-0.947912
0.787	-0.948311
0.788	-0.949184
0.789	-0.94952
0.79	-0.948125
0.791	-0.9458
0.792	-0.944855
0.793	-0.944334
0.794	-0.943644
0.795	-0.9421
0.796	-0.939867
0.797	-0.938291
0.798	-0.938119
0.799	-0.938706
0.8	-0.938936
0.801	-0.938471
0.802	-0.93807
0.803	-0.940015
0.804	-0.943145
0.805	-0.944506
0.806	-0.945173
0.807	-0.946308
0.808	-0.947222
0.809	-0.949612
0.81	-0.950036
0.811	-0.950792
0.812	-0.950982
0.813	-0.950972
0.814	-0.95106
0.815	-0.95216
0.816	-0.954978
0.817	-0.957828
0.818	-0.959807
0.819	-0.962033
0.82	-0.965207
0.821	-0.969986
0.822	-0.972999
0.823	-0.974082
0.824	-0.973421
0.825	-0.973293
0.826	-0.976137
0.827	-0.97855
0.828	-0.979057
0.829	-0.978358
0.83	-0.978413
0.831	-0.979761
0.832	-0.981082
0.833	-0.980143
0.834	-0.977279
0.835	-0.977206
0.836	-0.978212
0.837	-0.979711
0.838	-0.981406
0.839	-0.982725
0.84	-0.983394
0.841	-0.984303
0.842	-0.985079
0.843	-0.986045
0.844	-0.987481
0.845	-0.98833
0.846	-0.98926
0.847	-0.991442
0.848	-0.991767
0.849	-0.992175
0.85	-0.994826
0.851	-0.996002
0.852	-0.996827
0.853	-0.998066
0.854	-0.999554
0.855	-1.00063
0.856	-1.00144
0.857	-1.00247
0.858	-1.0055
0.859	-1.00908
0.86	-1.01122
0.861	-1.01331
0.862	-1.0146
0.863	-1.01571
0.864	-1.0158
0.865	-1.01621
0.866	-1.01774
0.867	-1.01787
0.868	-1.01892
0.869	-1.01873
0.87	-1.01984
0.871	-1.01984
0.872	-1.01984
0.873	-1.02091
0.874	-1.02383
0.875	-1.02454
0.876	-1.02551
0.877	-1.02655
0.878	-1.02561
0.879	-1.02263
0.88	-1.0202
0.881	-1.0199
0.882	-1.01947
0.883	-1.01838
0.884	-1.01873
0.885	-1.01915
0.886	-1.01734
0.887	-1.01719
0.888	-1.01674
0.889	-1.01851
0.89	-1.01967
0.891	-1.01793
0.892	-1.01728
0.893	-1.01632
0.894	-1.01619
0.895	-1.01604
0.896	-1.01642
0.897	-1.01633
0.898	-1.01503
0.899	-1.01271
0.9	-1.01105
0.901	-1.01161
0.902	-1.0123
0.903	-1.01188
0.904	-1.01268
0.905	-1.01427
0.906	-1.01408
0.907	-1.01263
0.908	-1.01089
0.909	-1.00824
0.91	-1.00709
0.911	-1.00683
0.912	-1.00486
0.913	-1.00378
0.914	-1.00253
0.915	-0.999821
0.916	-0.999746
0.917	-0.998451
0.918	-0.996652
0.919	-0.993707
0.92	-0.991919
0.921	-0.990014
0.922	-0.987762
0.923	-0.987193
0.924	-0.987271
0.925	-0.986637
0.926	-0.983484
0.927	-0.979091
0.928	-0.978391
0.929	-0.977911
0.93	-0.977654
0.931	-0.976771
0.932	-0.977159
0.933	-0.978632
0.934	-0.979456
0.935	-0.980056
0.936	-0.979331
0.937	-0.980097
0.938	-0.980496
0.939	-0.980248
0.94	-0.981528
0.941	-0.981695
0.942	-0.982374
0.943	-0.983149
0.944	-0.985283
0.945	-0.985569
0.946	-0.985743
0.947	-0.98598
0.948	-0.985828
0.949	-0.987117
0.95	-0.988067
0.951	-0.988842
0.952	-0.989984
0.953	-0.99041
0.954	-0.990132
0.955	-0.98883
0.956	-0.98727
0.957	-0.985168
0.958	-0.983112
0.959	-0.981016
0.96	-0.980122
0.961	-0.981216
0.962	-0.98112
0.963	-0.981275
0.964	-0.981353
0.965	-0.980734
0.966	-0.981353
0.967	-0.981372
0.968	-0.981972
0.969	-0.979617
0.97	-0.978046
0.971	-0.977566
0.972	-0.978506
0.973	-0.978752
0.974	-0.977109
0.975	-0.975894
0.976	-0.975793
0.977	-0.976001
0.978	-0.975926
0.979	-0.977839
0.98	-0.978154
0.981	-0.979084
0.982	-0.981114
0.983	-0.982202
0.984	-0.984201
0.985	-0.986077
0.986	-0.986997
0.987	-0.987788
0.988	-0.988194
0.989	-0.986518
0.99	-0.986817
0.991	-0.985711
0.992	-0.984507
0.993	-0.985006
0.994	-0.986147
0.995	-0.986814
0.996	-0.985459
0.997	-0.983001
0.998	-0.981656
0.999	-0.982649
1	-0.984083
1.001	-0.984735
1.002	-0.985812
1.003	-0.987157
1.004	-0.988405
1.005	-0.993664
1.006	-0.992588
1.007	-0.991378
1.008	-0.992673
1.009	-0.993834
1.01	-0.994385
1.011	-0.996337
1.012	-0.996949
1.013	-0.996694
1.014	-0.995023
1.015	-0.995004
1.016	-0.99557
1.017	-0.998358
1.018	-1.00094
1.019	-1.00057
1.02	-0.999945
1.021	-0.999347
1.022	-0.999156
1.023	-0.996971
1.024	-0.993798
1.025	-0.991919
1.026	-0.989638
1.027	-0.987924
1.028	-0.9864
1.029	-0.985886
1.03	-0.98548
1.031	-0.984645
1.032	-0.984376
1.033	-0.983963
1.034	-0.982576
1.035	-0.981262
1.036	-0.979516
1.037	-0.978761
1.038	-0.980937
1.039	-0.983405
1.04	-0.985075
1.041	-0.984767
1.042	-0.983054
1.043	-0.980138
1.044	-0.978941
1.045	-0.978762
1.046	-0.978689
1.047	-0.977696
1.048	-0.97896
1.049	-0.980485
1.05	-0.98164
1.051	-0.98265
1.052	-0.98222
1.053	-0.982821
1.054	-0.983796
1.055	-0.984395
1.056	-0.984721
1.057	-0.984729
1.058	-0.985917
1.059	-0.986888
1.06	-0.987628
1.061	-0.988359
1.062	-0.988011
1.063	-0.986168
1.064	-0.986781
1.065	-0.986165
1.066	-0.987512
1.067	-0.987856
1.068	-0.988926
1.069	-0.990523
1.07	-0.99087
1.071	-0.991199
1.072	-0.991858
1.073	-0.991731
1.074	-0.991441
1.075	-0.991556
1.076	-0.991916
1.077	-0.992008
1.078	-0.99181
1.079	-0.991479
1.08	-0.990934
1.081	-0.991106
1.082	-0.992167
1.083	-0.993442
1.084	-0.996063
1.085	-0.999568
1.086	-1.00317
1.087	-1.00472
1.088	-1.00523
1.089	-1.00449
1.09	-1.00285
1.091	-1.00254
1.092	-1.00327
1.093	-1.00402
1.094	-1.00384
1.095	-1.00488
1.096	-1.0052
1.097	-1.00503
1.098	-1.00544
1.099	-1.00555
1.1	-1.00529
1.101	-1.00504
1.102	-1.00649
1.103	-1.00764
1.104	-1.00844
1.105	-1.00885
1.106	-1.00921
1.107	-1.00931
1.108	-1.00759
1.109	-1.00506
1.11	-1.0017
1.111	-0.997923
1.112	-0.996297
1.113	-0.995853
1.114	-0.997139
1.115	-0.998515
1.116	-1.00007
1.117	-1.00138
1.118	-1.0024
1.119	-1.00283
1.12	-1.00244
1.121	-1.00255
1.122	-1.00297
1.123	-1.00404
1.124	-1.00551
1.125	-1.00665
1.126	-1.00698
1.127	-1.0062
1.128	-1.00521
1.129	-1.00395
1.13	-1.00257
1.131	-1.00221
1.132	-1.00204
1.133	-1.00197
1.134	-1.00017
1.135	-0.99966
1.136	-1.00125
1.137	-1.00254
1.138	-1.00334
1.139	-1.0037
1.14	-1.006
1.141	-1.00693
1.142	-1.00666
1.143	-1.00654
1.144	-1.00595
1.145	-1.0061
1.146	-1.00677
1.147	-1.00757
1.148	-1.00694
1.149	-1.00615
1.15	-1.00558
1.151	-1.00505
1.152	-1.00529
1.153	-1.00619
1.154	-1.00857
1.155	-1.01148
1.156	-1.0131
1.157	-1.01432
1.158	-1.01635
1.159	-1.01935
1.16	-1.02152
1.161	-1.023
1.162	-1.02397
1.163	-1.02583
1.164	-1.02798
1.165	-1.02886
1.166	-1.02931
1.167	-1.02982
1.168	-1.03078
1.169	-1.03144
1.17	-1.03162
1.171	-1.03105
1.172	-1.03041
1.173	-1.03167
1.174	-1.03269
1.175	-1.03343
1.176	-1.03343
1.177	-1.03338
1.178	-1.03364
1.179	-1.03276
1.18	-1.0308
1.181	-1.0295
1.182	-1.02903
1.183	-1.02734
1.184	-1.02623
1.185	-1.02502
1.186	-1.02293
1.187	-1.02184
1.188	-1.02074
1.189	-1.01807
1.19	-1.01445
1.191	-1.0122
1.192	-1.01095
1.193	-1.01129
1.194	-1.01206
1.195	-1.01258
1.196	-1.01309
1.197	-1.01274
1.198	-1.01054
1.199	-1.01022
1.2	-1.01279
1.201	-1.01476
1.202	-1.01522
1.203	-1.01365
1.204	-1.0135
1.205	-1.01588
1.206	-1.01606
1.207	-1.01346
1.208	-1.0122
1.209	-1.0113
1.21	-1.01086
1.211	-1.01115
1.212	-1.01104
1.213	-1.01187
1.214	-1.01373
1.215	-1.01321
1.216	-1.01201
1.217	-1.01246
1.218	-1.01195
1.219	-1.01202
1.22	-1.01222
1.221	-1.01035
1.222	-1.00947
1.223	-1.01036
1.224	-1.00979
1.225	-1.00813
1.226	-1.0069
1.227	-1.00716
1.228	-1.00914
1.229	-1.00828
1.23	-1.00601
1.231	-1.00635
1.232	-1.00805
1.233	-1.00808
1.234	-1.00715
1.235	-1.00719
1.236	-1.00772
1.237	-1.0091
1.238	-1.00791
1.239	-1.00697
1.24	-1.00862
1.241	-1.01087
1.242	-1.01072
1.243	-1.00926
1.244	-1.00877
1.245	-1.00779
1.246	-1.0087
1.247	-1.01046
1.248	-1.01144
1.249	-1.01206
1.25	-1.01073
1.251	-1.01047
1.252	-1.01104
1.253	-1.01076
1.254	-1.01159
1.255	-1.01275
1.256	-1.01248
1.257	-1.01365
1.258	-1.01525
1.259	-1.01664
1.26	-1.01787
1.261	-1.01766
1.262	-1.01672
1.263	-1.01647
1.264	-1.01531
1.265	-1.01496
1.266	-1.01511
1.267	-1.0149
1.268	-1.01481
1.269	-1.01455
1.27	-1.01485
1.271	-1.01503
1.272	-1.01561
1.273	-1.01533
1.274	-1.01266
1.275	-1.00943
1.276	-1.00643
1.277	-1.00302
1.278	-0.999037
1.279	-0.994686
1.28	-0.991953
1.281	-0.990392
1.282	-0.988468
1.283	-0.986152
1.284	-0.983346
1.285	-0.98203
1.286	-0.982785
1.287	-0.9845
1.288	-0.986773
1.289	-0.988538
1.29	-0.988393
1.291	-0.98756
1.292	-0.988515
1.293	-0.989261
1.294	-0.989109
1.295	-0.986922
1.296	-0.985697
1.297	-0.984195
1.298	-0.983289
1.299	-0.984399
1.3	-0.987717
1.301	-0.992665
1.302	-0.998333
1.303	-1.00358
1.304	-1.00797
1.305	-1.01106
1.306	-1.01314
1.307	-1.0158
1.308	-1.01887
1.309	-1.0226
1.31	-1.02563
1.311	-1.02601
1.312	-1.02534
1.313	-1.02425
1.314	-1.02364
1.315	-1.02521
1.316	-1.02714
1.317	-1.02766
1.318	-1.02845
1.319	-1.02958
1.32	-1.03133
1.321	-1.0328
1.322	-1.03346
1.323	-1.03341
1.324	-1.03384
1.325	-1.03351
1.326	-1.03171
1.327	-1.02944
1.328	-1.02864
1.329	-1.02929
1.33	-1.0305
1.331	-1.03024
1.332	-1.02812
1.333	-1.02687
1.334	-1.02617
1.335	-1.02517
1.336	-1.02443
1.337	-1.02387
1.338	-1.02425
1.339	-1.0237
1.34	-1.02128
1.341	-1.01887
1.342	-1.01593
1.343	-1.0125
1.344	-1.01044
1.345	-1.00945
1.346	-1.00842
1.347	-1.00719
1.348	-1.00718
1.349	-1.00593
1.35	-1.00436
1.351	-1.00212
1.352	-1.00084
1.353	-0.998284
1.354	-0.995428
1.355	-0.992515
1.356	-0.991243
1.357	-0.990894
1.358	-0.99028
1.359	-0.989636
1.36	-0.989251
1.361	-0.98847
1.362	-0.986753
1.363	-0.9839
1.364	-0.981745
1.365	-0.981821
1.366	-0.982331
1.367	-0.983624
1.368	-0.985978
1.369	-0.987349
1.37	-0.987773
1.371	-0.988671
1.372	-0.989855
1.373	-0.988351
1.374	-0.987081
1.375	-0.989097
1.376	-0.990796
1.377	-0.993244
1.378	-0.996133
1.379	-0.998964
1.38	-1.00143
1.381	-1.00298
1.382	-1.00457
1.383	-1.00633
1.384	-1.00783
1.385	-1.00849
1.386	-1.00846
1.387	-1.01006
1.388	-1.01248
1.389	-1.01462
1.39	-1.01634
1.391	-1.01728
1.392	-1.018
1.393	-1.01792
1.394	-1.01802
1.395	-1.01754
1.396	-1.01669
1.397	-1.01515
1.398	-1.01677
1.399	-1.01972
1.4	-1.0176
1.401	-1.01815
1.402	-1.01836
1.403	-1.02044
1.404	-1.02076
1.405	-1.02015
1.406	-1.02097
1.407	-1.02151
1.408	-1.02103
1.409	-1.01978
1.41	-1.0198
1.411	-1.0207
1.412	-1.02157
1.413	-1.02177
1.414	-1.02223
1.415	-1.02267
1.416	-1.02354
1.417	-1.02341
1.418	-1.02182
1.419	-1.02173
1.42	-1.02229
1.421	-1.02412
1.422	-1.02747
1.423	-1.02871
1.424	-1.0284
1.425	-1.02909
1.426	-1.02957
1.427	-1.02746
1.428	-1.02277
1.429	-1.02219
1.43	-1.02245
1.431	-1.02192
1.432	-1.02226
1.433	-1.02398
1.434	-1.02511
1.435	-1.02456
1.436	-1.02575
1.437	-1.02673
1.438	-1.02675
1.439	-1.025
1.44	-1.02367
1.441	-1.02493
1.442	-1.02691
1.443	-1.02967
1.444	-1.03048
1.445	-1.03283
1.446	-1.0343
1.447	-1.03381
1.448	-1.03338
1.449	-1.03503
1.45	-1.03909
1.451	-1.04158
1.452	-1.04496
1.453	-1.04958
1.454	-1.05004
1.455	-1.04964
1.456	-1.0515
1.457	-1.05059
1.458	-1.04882
1.459	-1.04854
1.46	-1.04944
1.461	-1.04931
1.462	-1.04692
1.463	-1.04789
1.464	-1.05055
1.465	-1.05344
1.466	-1.05197
1.467	-1.05219
1.468	-1.05134
1.469	-1.05359
1.47	-1.05418
1.471	-1.05302
1.472	-1.05338
1.473	-1.05549
1.474	-1.05726
1.475	-1.05526
1.476	-1.05267
1.477	-1.04924
1.478	-1.04774
1.479	-1.04765
1.48	-1.0483
1.481	-1.04713
1.482	-1.0473
1.483	-1.04736
1.484	-1.04744
1.485	-1.04746
1.486	-1.0468
1.487	-1.04625
1.488	-1.04373
1.489	-1.04228
1.49	-1.04256
1.491	-1.04239
1.492	-1.04164
1.493	-1.04224
1.494	-1.04162
1.495	-1.04052
1.496	-1.04022
1.497	-1.04136
1.498	-1.04126
1.499	-1.04151
1.5	-1.04373
1.501	-1.0452
1.502	-1.04601
1.503	-1.04733
1.504	-1.04813
1.505	-1.04843
1.506	-1.04783
1.507	-1.04817
1.508	-1.04887
1.509	-1.04928
1.51	-1.05024
1.511	-1.0518
1.512	-1.05385
1.513	-1.05589
1.514	-1.0574
1.515	-1.05619
1.516	-1.05622
1.517	-1.05666
1.518	-1.05611
1.519	-1.05599
1.52	-1.05566
1.521	-1.0557
1.522	-1.05477
1.523	-1.05377
1.524	-1.05453
1.525	-1.05352
1.526	-1.0529
1.527	-1.05204
1.528	-1.0511
1.529	-1.05157
1.53	-1.05229
1.531	-1.05286
1.532	-1.05326
1.533	-1.05388
1.534	-1.05462
1.535	-1.05358
1.536	-1.05223
1.537	-1.05176
1.538	-1.05104
1.539	-1.05026
1.54	-1.05085
1.541	-1.05199
1.542	-1.05303
1.543	-1.05355
1.544	-1.05418
1.545	-1.05619
1.546	-1.05716
1.547	-1.05708
1.548	-1.05704
1.549	-1.05416
1.55	-1.05232
1.551	-1.05295
1.552	-1.05473
1.553	-1.05487
1.554	-1.05364
1.555	-1.05149
1.556	-1.05094
1.557	-1.05145
1.558	-1.05016
1.559	-1.04853
1.56	-1.0472
1.561	-1.04731
1.562	-1.04775
1.563	-1.04905
1.564	-1.05004
1.565	-1.05018
1.566	-1.0486
1.567	-1.04869
1.568	-1.04881
1.569	-1.04798
1.57	-1.04625
1.571	-1.04469
1.572	-1.0437
1.573	-1.04302
1.574	-1.04396
1.575	-1.0461
1.576	-1.04615
1.577	-1.0459
1.578	-1.04669
1.579	-1.04776
1.58	-1.04873
1.581	-1.0485
1.582	-1.04747
1.583	-1.04888
1.584	-1.05002
1.585	-1.0516
1.586	-1.05211
1.587	-1.05234
1.588	-1.05004
1.589	-1.04785
1.59	-1.04618
1.591	-1.04557
1.592	-1.04396
1.593	-1.0433
1.594	-1.04286
1.595	-1.04137
1.596	-1.04193
1.597	-1.0433
1.598	-1.04299
1.599	-1.04235
1.6	-1.0415
1.601	-1.04087
1.602	-1.04168
1.603	-1.04182
1.604	-1.04192
1.605	-1.04347
1.606	-1.04353
1.607	-1.04355
1.608	-1.04301
1.609	-1.043
1.61	-1.04321
1.611	-1.04255
1.612	-1.0417
1.613	-1.04348
1.614	-1.0438
1.615	-1.04385
1.616	-1.04404
1.617	-1.04528
1.618	-1.04413
1.619	-1.0437
1.62	-1.04557
1.621	-1.04648
1.622	-1.04434
1.623	-1.04384
1.624	-1.04282
1.625	-1.04259
1.626	-1.04272
1.627	-1.03998
1.628	-1.0384
1.629	-1.03872
1.63	-1.03708
1.631	-1.03549
1.632	-1.03476
1.633	-1.03446
1.634	-1.03451
1.635	-1.03494
1.636	-1.03493
1.637	-1.03397
1.638	-1.03325
1.639	-1.03514
1.64	-1.03574
1.641	-1.03611
1.642	-1.03574
1.643	-1.03619
1.644	-1.03482
1.645	-1.03327
1.646	-1.03139
1.647	-1.03145
1.648	-1.03064
1.649	-1.03021
1.65	-1.02947
1.651	-1.02899
1.652	-1.03099
1.653	-1.03242
1.654	-1.03234
1.655	-1.03169
1.656	-1.03307
1.657	-1.03318
1.658	-1.03136
1.659	-1.0302
1.66	-1.03005
1.661	-1.02994
1.662	-1.02991
1.663	-1.02812
1.664	-1.02676
1.665	-1.02445
1.666	-1.02627
1.667	-1.02734
1.668	-1.02816
1.669	-1.03052
1.67	-1.03067
1.671	-1.03179
1.672	-1.03167
1.673	-1.03142
1.674	-1.03318
1.675	-1.03325
1.676	-1.03312
1.677	-1.03083
1.678	-1.02949
1.679	-1.02874
1.68	-1.02815
1.681	-1.02867
1.682	-1.02753
1.683	-1.0297
1.684	-1.03073
1.685	-1.02955
1.686	-1.03031
1.687	-1.03227
1.688	-1.0349
1.689	-1.03594
1.69	-1.03992
1.691	-1.03808
1.692	-1.03595
1.693	-1.03481
1.694	-1.03277
1.695	-1.03344
1.696	-1.0337
1.697	-1.0355
1.698	-1.03871
1.699	-1.04144
1.7	-1.0421
1.701	-1.04313
1.702	-1.04246
1.703	-1.04312
1.704	-1.04493
1.705	-1.04641
1.706	-1.04748
1.707	-1.04924
1.708	-1.04941
1.709	-1.0488
1.71	-1.049
1.711	-1.04847
1.712	-1.04745
1.713	-1.04665
1.714	-1.04729
1.715	-1.04542
1.716	-1.04626
1.717	-1.04777
1.718	-1.04946
1.719	-1.05305
1.72	-1.053
1.721	-1.05499
1.722	-1.05379
1.723	-1.05276
1.724	-1.05055
1.725	-1.05077
1.726	-1.05208
1.727	-1.05332
1.728	-1.05244
1.729	-1.05197
1.73	-1.0536
1.731	-1.05051
1.732	-1.051
1.733	-1.04956
1.734	-1.05078
1.735	-1.05149
1.736	-1.05041
1.737	-1.05027
1.738	-1.04977
1.739	-1.04899
1.74	-1.04786
1.741	-1.04654
1.742	-1.0448
1.743	-1.04363
1.744	-1.04101
1.745	-1.03941
1.746	-1.03787
1.747	-1.03813
1.748	-1.03681
1.749	-1.03629
1.75	-1.0346
1.751	-1.03355
1.752	-1.03469
1.753	-1.03584
1.754	-1.03401
1.755	-1.03267
1.756	-1.03462
1.757	-1.03449
1.758	-1.03528
1.759	-1.03498
1.76	-1.03602
1.761	-1.03702
1.762	-1.03746
1.763	-1.03787
1.764	-1.03718
1.765	-1.03761
1.766	-1.03856
1.767	-1.03653
1.768	-1.03647
1.769	-1.03877
1.77	-1.04185
1.771	-1.04251
1.772	-1.04289
1.773	-1.04408
1.774	-1.04357
1.775	-1.04543
1.776	-1.04638
1.777	-1.0476
1.778	-1.04811
1.779	-1.0494
1.78	-1.05019
1.781	-1.05101
1.782	-1.05149
1.783	-1.05276
1.784	-1.05264
1.785	-1.05136
1.786	-1.05147
1.787	-1.05078
1.788	-1.04954
1.789	-1.04873
1.79	-1.05022
1.791	-1.04982
1.792	-1.05353
1.793	-1.05483
1.794	-1.05474
1.795	-1.05218
1.796	-1.05064
1.797	-1.04997
1.798	-1.04919
1.799	-1.04954
1.8	-1.04909
1.801	-1.04823
1.802	-1.04929
1.803	-1.04853
1.804	-1.04837
1.805	-1.04742
1.806	-1.04724
1.807	-1.0469
1.808	-1.04336
1.809	-1.045
1.81	-1.04743
1.811	-1.04865
1.812	-1.04998
1.813	-1.05334
1.814	-1.05516
1.815	-1.0552
1.816	-1.05625
1.817	-1.05673
1.818	-1.05522
1.819	-1.0527
1.82	-1.05403
1.821	-1.05591
1.822	-1.05664
1.823	-1.05645
1.824	-1.05587
1.825	-1.05627
1.826	-1.05629
1.827	-1.05373
1.828	-1.05341
1.829	-1.05269
1.83	-1.05374
1.831	-1.05189
1.832	-1.05156
1.833	-1.05494
1.834	-1.05406
1.835	-1.05131
1.836	-1.04903
1.837	-1.04916
1.838	-1.04795
1.839	-1.04594
1.84	-1.04724
1.841	-1.04546
1.842	-1.04556
1.843	-1.04641
1.844	-1.04856
1.845	-1.05037
1.846	-1.05068
1.847	-1.05181
1.848	-1.05244
1.849	-1.05334
1.85	-1.05175
1.851	-1.05222
1.852	-1.05345
1.853	-1.05323
1.854	-1.0536
1.855	-1.05238
1.856	-1.05347
1.857	-1.0525
1.858	-1.05071
1.859	-1.04911
1.86	-1.04918
1.861	-1.04956
1.862	-1.04913
1.863	-1.04846
1.864	-1.04973
1.865	-1.04709
1.866	-1.04668
1.867	-1.04441
1.868	-1.04348
1.869	-1.04188
1.87	-1.03885
1.871	-1.03788
1.872	-1.03635
1.873	-1.03565
1.874	-1.03491
1.875	-1.03415
1.876	-1.03312
1.877	-1.03311
1.878	-1.03334
1.879	-1.03416
1.88	-1.03435
1.881	-1.03438
1.882	-1.03507
1.883	-1.0377
1.884	-1.03948
1.885	-1.04093
1.886	-1.04215
1.887	-1.04269
1.888	-1.04479
1.889	-1.04637
1.89	-1.04891
1.891	-1.0504
1.892	-1.05182
1.893	-1.05123
1.894	-1.05222
1.895	-1.05298
1.896	-1.05408
1.897	-1.05525
1.898	-1.05662
1.899	-1.0587
1.9	-1.06242
1.901	-1.06298
1.902	-1.06326
1.903	-1.06502
1.904	-1.06669
1.905	-1.06924
1.906	-1.07084
1.907	-1.07061
1.908	-1.0695
1.909	-1.06979
1.909	-1.06985
1.91	-1.06937
1.911	-1.06843
1.912	-1.06961
1.913	-1.06941
1.914	-1.07066
1.915	-1.07054
1.916	-1.07129
1.917	-1.07333
1.918	-1.0752
1.919	-1.0756
1.92	-1.07445
1.921	-1.07512
1.922	-1.07399
1.923	-1.07247
1.924	-1.0722
1.925	-1.07216
1.926	-1.07185
1.927	-1.07021
1.928	-1.06882
1.929	-1.06671
1.93	-1.06504
1.931	-1.06584
1.932	-1.06541
1.933	-1.06486
1.934	-1.0632
1.935	-1.06237
1.936	-1.06189
1.937	-1.05941
1.938	-1.05793
1.939	-1.05578
1.94	-1.05358
1.941	-1.05166
1.942	-1.05026
1.943	-1.0453
1.944	-1.04432
1.945	-1.04453
1.946	-1.04387
1.947	-1.04454
1.948	-1.0426
1.949	-1.04127
1.95	-1.03976
1.951	-1.03962
1.952	-1.03893
1.953	-1.03823
1.954	-1.03761
1.955	-1.03819
1.956	-1.03777
1.957	-1.03852
1.958	-1.03902
1.959	-1.04188
1.96	-1.0438
1.961	-1.04558
1.962	-1.04608
1.963	-1.04642
1.964	-1.0467
1.965	-1.04974
1.966	-1.05152
1.967	-1.05338
1.968	-1.05744
1.969	-1.06006
1.97	-1.06063
1.971	-1.06188
1.972	-1.0623
1.973	-1.06569
1.974	-1.06624
1.975	-1.07095
1.976	-1.0732
1.977	-1.07498
1.978	-1.07745
1.979	-1.08014
1.98	-1.08145
1.981	-1.08348
1.982	-1.0848
1.983	-1.0856
1.984	-1.08443
1.985	-1.08452
1.986	-1.0855
1.987	-1.08601
1.988	-1.08711
1.989	-1.0884
1.99	-1.08881
1.991	-1.08891
1.992	-1.08988
1.993	-1.09137
1.994	-1.09116
1.995	-1.09066
[truncated: 24,948 more rows]
