# Supplementary material for: Structure of the connexin-43 gap junction channel in a putative closed state
Source: eLife journal article supplement (doi:10.7554/elife.87616), 2023-05-23
Supplement: fig1-figsupp2-data6 [file Figure 1 - figure supplement 2 - source data 6.xlsx]

## Sheet: Sheet1
Panel E
Chrom.1
0	0.004026
0.001	0.004484
0.002	0.007033
0.002	0.009464
0.003	0.01158
0.004	0.013921
0.004	0.016263
0.005	0.017179
0.006	0.016829
0.006	0.01745
0.007	0.018401
0.008	0.018382
0.008	0.018798
0.009	0.020639
0.01	0.022492
0.01	0.024048
0.011	0.025371
0.012	0.026181
0.012	0.027692
0.013	0.029661
0.014	0.030722
0.014	0.030474
0.015	0.030269
0.016	0.02969
0.016	0.031155
0.017	0.031221
0.018	0.031734
0.019	0.032676
0.019	0.033959
0.02	0.034853
0.021	0.035661
0.021	0.035835
0.022	0.035859
0.023	0.033963
0.023	0.034087
0.024	0.034692
0.025	0.032878
0.025	0.033258
0.026	0.034301
0.027	0.035423
0.027	0.033213
0.028	0.031738
0.029	0.031015
0.029	0.028878
0.03	0.027417
0.031	0.025497
0.031	0.02694
0.032	0.026403
0.033	0.025809
0.033	0.02592
0.034	0.025601
0.035	0.025202
0.035	0.023675
0.036	0.023155
0.037	0.02135
0.037	0.021072
0.038	0.020211
0.039	0.018786
0.039	0.019518
0.04	0.019889
0.041	0.020385
0.041	0.020441
0.042	0.020733
0.043	0.019963
0.043	0.02052
0.044	0.019825
0.045	0.020291
0.045	0.020335
0.046	0.02109
0.047	0.020279
0.047	0.020766
0.048	0.021483
0.049	0.020891
0.049	0.020548
0.05	0.021061
0.051	0.022706
0.051	0.023058
0.052	0.023174
0.053	0.023814
0.053	0.024638
0.054	0.024507
0.055	0.025695
0.055	0.026171
0.056	0.026605
0.057	0.027106
0.057	0.027472
0.058	0.029321
0.059	0.030948
0.059	0.03253
0.06	0.034154
0.061	0.035764
0.061	0.035465
0.062	0.036043
0.063	0.037385
0.063	0.03874
0.064	0.039121
0.065	0.039211
0.065	0.039623
0.066	0.040025
0.067	0.040288
0.067	0.040503
0.068	0.042017
0.069	0.042874
0.069	0.04311
0.07	0.043396
0.071	0.044397
0.071	0.0447
0.072	0.045392
0.073	0.046025
0.073	0.046857
0.074	0.048064
0.075	0.048124
0.075	0.047978
0.076	0.0479
0.077	0.047977
0.077	0.048299
0.078	0.049146
0.079	0.049308
0.079	0.049284
0.08	0.049596
0.081	0.050462
0.081	0.051123
0.082	0.051343
0.083	0.052751
0.083	0.054116
0.084	0.054536
0.085	0.054974
0.085	0.055299
0.086	0.056343
0.087	0.057649
0.087	0.058978
0.088	0.060928
0.089	0.062342
0.089	0.065915
0.09	0.071547
0.091	0.078828
0.091	0.087294
0.092	0.096315
0.093	0.106557
0.093	0.117867
0.094	0.129405
0.095	0.139349
0.095	0.149718
0.096	0.160698
0.097	0.17194
0.097	0.183209
0.098	0.194338
0.099	0.20459
0.099	0.21509
0.1	0.225105
0.101	0.233924
0.101	0.242183
0.102	0.251181
0.103	0.26117
0.103	0.271171
0.104	0.280412
0.105	0.289427
0.105	0.298299
0.106	0.306492
0.107	0.313655
0.107	0.319947
0.108	0.326848
0.109	0.333916
0.109	0.340793
0.11	0.348073
0.111	0.355896
0.111	0.363141
0.112	0.370271
0.113	0.377328
0.113	0.383931
0.114	0.390086
0.115	0.396621
0.115	0.403259
0.116	0.410648
0.117	0.418277
0.117	0.425703
0.118	0.432719
0.119	0.439735
0.119	0.447164
0.12	0.45444
0.121	0.461323
0.121	0.4681
0.122	0.475357
0.123	0.482063
0.123	0.489018
0.124	0.496509
0.125	0.504119
0.125	0.512021
0.126	0.520146
0.127	0.52752
0.127	0.533828
0.128	0.53938
0.129	0.545391
0.129	0.550513
0.13	0.555812
0.131	0.560234
0.131	0.560934
0.132	0.559737
0.133	0.556883
0.133	0.552939
0.134	0.548146
0.135	0.542514
0.135	0.534932
0.136	0.528514
0.137	0.522736
0.137	0.516869
0.138	0.51011
0.139	0.503192
0.139	0.496265
0.14	0.489925
0.141	0.483516
0.141	0.475958
0.142	0.469704
0.143	0.464269
0.143	0.459074
0.144	0.453404
0.145	0.446686
0.145	0.439935
0.146	0.433649
0.147	0.4278
0.147	0.422431
0.148	0.417502
0.149	0.412298
0.149	0.407362
0.15	0.402457
0.151	0.397355
0.151	0.391713
0.152	0.385216
0.153	0.379245
0.153	0.373413
0.154	0.367677
0.155	0.362282
0.155	0.357823
0.156	0.353355
0.157	0.349001
0.157	0.344544
0.158	0.339579
0.159	0.33483
0.159	0.330895
0.16	0.326106
0.161	0.320748
0.161	0.316112
0.162	0.311998
0.163	0.308107
0.163	0.304069
0.164	0.299768
0.165	0.295198
0.165	0.290335
0.166	0.284589
0.167	0.278233
0.167	0.272975
0.168	0.270363
0.169	0.269293
0.169	0.266712
0.17	0.262805
0.171	0.258732
0.171	0.255069
0.172	0.249735
0.173	0.246469
0.173	0.243008
0.174	0.239542
0.175	0.236344
0.175	0.233192
0.176	0.229994
0.177	0.227081
0.177	0.224224
0.178	0.22124
0.179	0.2181
0.179	0.214597
0.18	0.21146
0.181	0.208779
0.181	0.206396
0.182	0.203993
0.183	0.202761
0.183	0.201329
0.184	0.199613
0.185	0.197499
0.185	0.194914
0.186	0.19256
0.187	0.190461
0.187	0.188296
0.188	0.186502
0.189	0.185707
0.189	0.184676
0.19	0.183457
0.191	0.182512
0.191	0.181738
0.192	0.180886
0.193	0.180068
0.193	0.178709
0.194	0.178017
0.195	0.177108
0.195	0.175203
0.196	0.173984
0.197	0.172076
0.197	0.170368
0.198	0.168681
0.199	0.166632
0.199	0.163705
0.2	0.162114
0.201	0.159441
0.201	0.157204
0.202	0.155824
0.203	0.152777
0.203	0.150012
0.204	0.147172
0.205	0.144293
0.205	0.14187
0.206	0.138733
0.207	0.136124
0.207	0.134086
0.208	0.132407
0.209	0.13091
0.209	0.125564
0.21	0.119275
0.211	0.113811
0.211	0.110376
0.212	0.10923
0.213	0.107336
0.213	0.106205
0.214	0.105317
0.215	0.104414
0.215	0.103995
0.216	0.103348
0.217	0.102665
0.217	0.101699
0.218	0.100393
0.219	0.098913
0.219	0.097489
0.22	0.095913
0.221	0.0949
0.221	0.094486
0.222	0.094059
0.223	0.091483
0.223	0.089162
0.224	0.087046
0.225	0.085009
0.225	0.082959
0.226	0.082307
0.227	0.080245
0.227	0.078352
0.228	0.077031
0.229	0.076082
0.229	0.074471
0.23	0.07143
0.231	0.069706
0.231	0.069233
0.232	0.068968
0.233	0.067496
0.234	0.066233
0.234	0.064809
0.235	0.06343
0.236	0.06223
0.236	0.060542
0.237	0.060555
0.238	0.06015
0.238	0.059731
0.239	0.059622
0.24	0.058897
0.24	0.057871
0.241	0.058043
0.242	0.058188
0.242	0.057649
0.243	0.057259
0.244	0.056377
0.244	0.056298
0.245	0.056489
0.246	0.056486
0.246	0.056033
0.247	0.054947
0.248	0.054137
0.248	0.053353
0.249	0.052493
0.25	0.05162
0.25	0.051294
0.251	0.052166
0.252	0.053371
0.252	0.054117
0.253	0.053727
0.254	0.053017
0.254	0.05133
0.255	0.049161
0.256	0.04725
0.256	0.046288
0.257	0.044636
0.258	0.042739
0.258	0.040757
0.259	0.038952
0.26	0.037535
0.26	0.037001
0.261	0.036951
0.262	0.036995
0.262	0.036731
0.263	0.035645
0.264	0.033675
0.264	0.033224
0.265	0.033641
0.266	0.032971
0.266	0.033109
0.267	0.032861
0.268	0.032073
0.268	0.031436
0.269	0.031844
0.27	0.033345
0.27	0.033335
0.271	0.033263
0.272	0.033363
0.272	0.033413
0.273	0.032565
0.274	0.032737
0.274	0.033225
0.275	0.033902
0.276	0.03468
0.276	0.035296
0.277	0.036157
0.278	0.036223
0.278	0.035808
0.279	0.035331
0.28	0.035058
0.28	0.035057
0.281	0.034613
0.282	0.034605
0.282	0.034866
0.283	0.033363
0.284	0.03291
0.284	0.033298
0.285	0.033361
0.286	0.033039
0.286	0.033648
0.287	0.033965
0.288	0.034613
0.288	0.035782
0.289	0.037581
0.29	0.039978
0.29	0.041181
0.291	0.04194
0.292	0.043179
0.292	0.044277
0.293	0.043825
0.294	0.042538
0.294	0.043525
0.295	0.044418
0.296	0.045192
0.296	0.04672
0.297	0.048774
0.298	0.050393
0.298	0.052281
0.299	0.054664
0.3	0.057313
0.3	0.058369
0.301	0.060376
0.302	0.062483
0.302	0.063988
0.303	0.064456
0.304	0.064161
0.304	0.065314
0.305	0.067454
0.306	0.068912
0.306	0.069366
0.307	0.072153
0.308	0.073241
0.308	0.073864
0.309	0.074619
0.31	0.075702
0.31	0.076718
0.311	0.077039
0.312	0.077224
0.312	0.077628
0.313	0.078564
0.314	0.080535
0.314	0.082175
0.315	0.083022
0.316	0.083024
0.316	0.082766
0.317	0.083101
0.318	0.083235
0.318	0.083842
0.319	0.08516
0.32	0.086252
0.32	0.088148
0.321	0.090456
0.322	0.092555
0.322	0.094088
0.323	0.095076
0.324	0.095689
0.324	0.09774
0.325	0.100126
0.326	0.102104
0.326	0.103381
0.327	0.106328
0.328	0.107747
0.328	0.10927
0.329	0.110881
0.33	0.111322
0.33	0.111221
0.331	0.110923
0.332	0.110964
0.332	0.111402
0.333	0.111889
0.334	0.110385
0.334	0.11095
0.335	0.112205
0.336	0.113235
0.336	0.1136
0.337	0.11506
0.338	0.115542
0.338	0.115791
0.339	0.116285
0.34	0.117131
0.34	0.117137
0.341	0.117612
0.342	0.118503
0.342	0.119215
0.343	0.119299
0.344	0.119058
0.344	0.119666
0.345	0.120906
0.346	0.121936
0.346	0.12232
0.347	0.122775
0.348	0.12361
0.348	0.123661
0.349	0.123663
0.35	0.124139
0.35	0.12506
0.351	0.12563
0.352	0.125991
0.352	0.126214
0.353	0.126276
0.354	0.12605
0.354	0.126921
0.355	0.127225
0.356	0.127038
0.356	0.126599
0.357	0.126347
0.358	0.128248
0.358	0.128977
0.359	0.12947
0.36	0.12958
0.36	0.128809
0.361	0.130057
0.362	0.129931
0.362	0.129369
0.363	0.128611
0.364	0.127619
0.364	0.128594
0.365	0.128972
0.366	0.128512
0.366	0.127906
0.367	0.127342
0.368	0.126971
0.368	0.126314
0.369	0.125431
0.37	0.12469
0.37	0.123685
0.371	0.123338
0.372	0.122958
0.372	0.122358
0.373	0.12157
0.374	0.120478
0.374	0.119966
0.375	0.120486
0.376	0.121065
0.376	0.120657
0.377	0.120537
0.378	0.121169
0.378	0.121486
0.379	0.121894
0.38	0.122898
0.38	0.124016
0.381	0.12372
0.382	0.123702
0.382	0.123501
0.383	0.122775
0.384	0.122398
0.384	0.12254
0.385	0.122043
0.386	0.121644
0.386	0.121731
0.387	0.121635
0.388	0.120651
0.388	0.1196
0.389	0.119405
0.39	0.120057
0.39	0.12025
0.391	0.120735
0.392	0.121857
0.392	0.122664
0.393	0.123229
0.394	0.124736
0.394	0.124703
0.395	0.125084
0.396	0.124638
0.396	0.123878
0.397	0.124832
0.398	0.125066
0.398	0.126283
0.399	0.126519
0.4	0.125798
0.4	0.12539
0.401	0.125312
0.402	0.125524
0.402	0.125555
0.403	0.125532
0.404	0.125737
0.404	0.125206
0.405	0.124891
0.406	0.124043
0.406	0.123331
0.407	0.123519
0.408	0.123351
0.408	0.122641
0.409	0.12256
0.41	0.123054
0.41	0.123895
0.411	0.125335
0.412	0.125443
0.412	0.125379
0.413	0.125982
0.414	0.127331
0.414	0.127631
0.415	0.129091
0.416	0.129618
0.416	0.129723
0.417	0.129871
0.418	0.130056
0.418	0.129994
0.419	0.129469
0.42	0.128407
0.42	0.1274
0.421	0.126429
0.422	0.125673
0.422	0.125224
0.423	0.124965
0.424	0.124185
0.424	0.123685
0.425	0.124231
0.426	0.124739
0.426	0.124485
0.427	0.123942
0.428	0.123599
0.428	0.123286
0.429	0.123218
0.43	0.123341
0.43	0.123156
0.431	0.122565
0.432	0.123282
0.432	0.123701
0.433	0.123302
0.434	0.122945
0.434	0.122186
0.435	0.121102
0.436	0.120238
0.436	0.119833
0.437	0.119882
0.438	0.120787
0.438	0.120073
0.439	0.119826
0.44	0.119878
0.44	0.118895
0.441	0.11838
0.442	0.117859
0.442	0.117399
0.443	0.117111
0.444	0.117069
0.444	0.116968
0.445	0.116718
0.446	0.116605
0.447	0.116654
0.447	0.11679
0.448	0.116868
0.449	0.117071
0.449	0.11718
0.45	0.117222
0.451	0.117242
0.451	0.117133
0.452	0.117725
0.453	0.118295
0.453	0.118867
0.454	0.119356
0.455	0.119141
0.455	0.117618
0.456	0.117181
0.457	0.116593
0.457	0.115559
0.458	0.11589
0.459	0.115704
0.459	0.115431
0.46	0.115777
0.461	0.116688
0.461	0.117168
0.462	0.117443
0.463	0.118865
0.463	0.120135
0.464	0.120673
0.465	0.120589
0.465	0.120094
0.466	0.119707
0.467	0.11888
0.467	0.117926
0.468	0.11768
0.469	0.118412
0.469	0.118702
0.47	0.118552
0.471	0.118216
0.471	0.118654
0.472	0.118123
0.473	0.117804
0.473	0.117306
0.474	0.114768
0.475	0.114216
0.475	0.113161
0.476	0.112655
0.477	0.11261
0.477	0.112226
0.478	0.112334
0.479	0.113043
0.479	0.113544
0.48	0.113728
0.481	0.113802
0.481	0.11352
0.482	0.113567
0.483	0.113385
0.483	0.113142
0.484	0.113166
0.485	0.113082
0.485	0.112879
0.486	0.113069
0.487	0.113693
0.487	0.114648
0.488	0.115804
0.489	0.116635
0.489	0.117391
0.49	0.11779
0.491	0.117932
0.491	0.119365
0.492	0.120306
0.493	0.120619
0.493	0.120376
0.494	0.119301
0.495	0.116124
0.495	0.115323
0.496	0.115556
0.497	0.115498
0.497	0.115028
0.498	0.115917
0.499	0.11653
0.499	0.116849
0.5	0.116793
0.501	0.116342
0.501	0.115559
0.502	0.114013
0.503	0.113577
0.503	0.113496
0.504	0.113262
0.505	0.112484
0.505	0.110763
0.506	0.110627
0.507	0.11107
0.507	0.111506
0.508	0.111565
0.509	0.111565
0.509	0.110289
0.51	0.108928
0.511	0.107982
0.511	0.107727
0.512	0.10828
0.513	0.107354
0.513	0.107707
0.514	0.108228
0.515	0.1079
0.515	0.107858
0.516	0.106852
0.517	0.106478
0.517	0.105934
0.518	0.10492
0.519	0.104734
0.519	0.105097
0.52	0.104745
0.521	0.104072
0.521	0.103612
0.522	0.103959
0.523	0.103534
0.523	0.102941
0.524	0.102532
0.525	0.102667
0.525	0.103016
0.526	0.103055
0.527	0.102913
0.527	0.102688
0.528	0.102172
0.529	0.101232
0.529	0.099956
0.53	0.098644
0.531	0.097472
0.531	0.096388
0.532	0.095943
0.533	0.094744
0.533	0.093068
0.534	0.091627
0.535	0.091627
0.535	0.091186
0.536	0.09159
0.537	0.091886
0.537	0.091739
0.538	0.091409
0.539	0.091692
0.539	0.091197
0.54	0.090719
0.541	0.090507
0.541	0.090462
0.542	0.090683
0.543	0.091469
0.543	0.092283
0.544	0.092291
0.545	0.09095
0.545	0.091258
0.546	0.090087
0.547	0.089224
0.547	0.088329
0.548	0.086838
0.549	0.08685
0.549	0.086393
0.55	0.085266
0.551	0.084453
0.551	0.084678
0.552	0.08475
0.553	0.084379
0.553	0.084488
0.554	0.085006
0.555	0.085435
0.555	0.084377
0.556	0.083616
0.557	0.084088
0.557	0.084961
0.558	0.085421
0.559	0.085088
0.559	0.086192
0.56	0.086403
0.561	0.085605
0.561	0.084345
0.562	0.083931
0.563	0.084266
0.563	0.084033
0.564	0.083552
0.565	0.083272
0.565	0.083679
0.566	0.083744
0.567	0.083524
0.567	0.083497
0.568	0.083816
0.569	0.084351
0.569	0.084417
0.57	0.084343
0.571	0.084249
0.571	0.084121
0.572	0.083925
0.573	0.084032
0.573	0.083505
0.574	0.08322
0.575	0.083255
0.575	0.08331
0.576	0.082511
0.577	0.082202
0.577	0.082428
0.578	0.083136
0.579	0.082652
0.579	0.082643
0.58	0.083377
0.581	0.084311
0.581	0.084545
0.582	0.084365
0.583	0.082763
0.583	0.08158
0.584	0.081029
0.585	0.080733
0.585	0.080636
0.586	0.080899
0.587	0.08052
0.587	0.080412
0.588	0.081527
0.589	0.082595
0.589	0.083331
0.59	0.083592
0.591	0.083596
0.591	0.083788
0.592	0.085128
0.593	0.085549
0.593	0.085931
0.594	0.086174
0.595	0.086004
0.595	0.085014
0.596	0.084396
0.597	0.084655
0.597	0.084755
0.598	0.08415
0.599	0.083349
0.599	0.083194
0.6	0.083082
0.601	0.082346
0.601	0.081235
0.602	0.081115
0.603	0.081468
0.603	0.081681
0.604	0.08133
0.605	0.080504
0.605	0.079728
0.606	0.079356
0.607	0.078345
0.607	0.077761
0.608	0.077547
0.609	0.076864
0.609	0.076617
0.61	0.075918
0.611	0.074996
0.611	0.074196
0.612	0.073917
0.613	0.074079
0.613	0.073918
0.614	0.074073
0.615	0.074168
0.615	0.073476
0.616	0.072681
0.617	0.073211
0.617	0.073111
0.618	0.072387
0.619	0.071688
0.619	0.071235
0.62	0.070682
0.621	0.070121
0.621	0.069062
0.622	0.067202
0.623	0.065513
0.623	0.064986
0.624	0.065418
0.625	0.065685
0.625	0.064972
0.626	0.063683
0.627	0.063133
0.627	0.063382
0.628	0.063352
0.629	0.062498
0.629	0.061476
0.63	0.060921
0.631	0.060286
0.631	0.059528
0.632	0.058649
0.633	0.059484
0.633	0.059751
0.634	0.059562
0.635	0.059505
0.635	0.060282
0.636	0.059684
0.637	0.059328
0.637	0.059125
0.638	0.058958
0.639	0.059175
0.639	0.059182
0.64	0.059025
0.641	0.058652
0.641	0.058131
0.642	0.057747
0.643	0.057665
0.643	0.057706
0.644	0.057755
0.645	0.05762
0.645	0.057006
0.646	0.057148
0.647	0.057319
0.647	0.057483
0.648	0.057829
0.649	0.058679
0.649	0.058906
0.65	0.059088
0.651	0.059413
0.651	0.060022
0.652	0.060994
0.653	0.061811
0.653	0.061857
0.654	0.061559
0.655	0.061688
0.655	0.062808
0.656	0.062621
0.657	0.063362
0.657	0.064057
0.658	0.064328
0.659	0.064251
0.659	0.065291
0.66	0.065207
0.661	0.065202
0.662	0.065425
0.662	0.065653
0.663	0.065132
0.664	0.065841
0.664	0.066544
0.665	0.066976
0.666	0.066997
0.666	0.066395
0.667	0.067137
0.668	0.068119
0.668	0.068963
0.669	0.069467
0.67	0.06964
0.67	0.07017
0.671	0.070322
0.672	0.07035
0.672	0.07045
0.673	0.070659
0.674	0.070971
0.674	0.071031
0.675	0.071177
0.676	0.071577
0.676	0.07218
0.677	0.070909
0.678	0.070396
0.678	0.070092
0.679	0.070163
0.68	0.071111
0.68	0.070852
0.681	0.071162
0.682	0.071928
0.682	0.072645
0.683	0.072798
0.684	0.073913
0.684	0.07492
0.685	0.075569
0.686	0.075442
0.686	0.07637
0.687	0.077054
0.688	0.077411
0.688	0.077635
0.689	0.078104
0.69	0.078464
0.69	0.078474
0.691	0.078176
0.692	0.078031
0.692	0.078479
0.693	0.077385
0.694	0.076928
0.694	0.076241
0.695	0.075577
0.696	0.075573
0.696	0.076555
0.697	0.075896
0.698	0.075299
0.698	0.074746
0.699	0.073949
0.7	0.07344
0.7	0.07238
0.701	0.071524
0.702	0.070911
0.702	0.070428
0.703	0.069937
0.704	0.069543
0.704	0.070714
0.705	0.071351
0.706	0.070344
0.706	0.069671
0.707	0.069208
0.708	0.069306
0.708	0.069561
0.709	0.069481
0.71	0.068471
0.71	0.067621
0.711	0.06743
0.712	0.067197
0.712	0.066805
0.713	0.066847
0.714	0.066871
0.714	0.066845
0.715	0.066573
0.716	0.065942
0.716	0.064928
0.717	0.063964
0.718	0.063404
0.718	0.063407
0.719	0.063662
0.72	0.063629
0.72	0.064023
0.721	0.063083
0.722	0.062479
0.722	0.062691
0.723	0.063475
0.724	0.063097
0.724	0.063436
0.725	0.063292
0.726	0.062824
0.726	0.062608
0.727	0.063229
0.728	0.062929
0.728	0.062955
0.729	0.063264
0.73	0.063537
0.73	0.063429
0.731	0.063545
0.732	0.06379
0.732	0.064077
0.733	0.064213
0.734	0.063747
0.734	0.062981
0.735	0.061096
0.736	0.059961
0.736	0.060104
0.737	0.059311
0.738	0.058856
0.738	0.058217
0.739	0.057193
0.74	0.056225
0.74	0.056683
0.741	0.05713
0.742	0.057384
0.742	0.057481
0.743	0.057523
0.744	0.058002
0.744	0.058432
0.745	0.058743
0.746	0.05863
0.746	0.057168
0.747	0.057982
0.748	0.059352
0.748	0.059892
0.749	0.059514
0.75	0.059874
0.75	0.058313
0.751	0.058587
0.752	0.0592
0.752	0.059175
0.753	0.058228
0.754	0.058546
0.754	0.059155
0.755	0.059399
0.756	0.059234
0.756	0.059099
0.757	0.058721
0.758	0.058577
0.758	0.058702
0.759	0.059051
0.76	0.059484
0.76	0.059352
0.761	0.059761
0.762	0.059963
0.762	0.060264
0.763	0.0611
0.764	0.061154
0.764	0.06027
0.765	0.059534
0.766	0.058846
0.766	0.058015
0.767	0.057931
0.768	0.057101
0.768	0.056097
0.769	0.05553
0.77	0.05549
0.77	0.054557
0.771	0.053682
0.772	0.053467
0.772	0.05317
0.773	0.05248
0.774	0.052468
0.774	0.051777
0.775	0.051705
0.776	0.052031
0.776	0.052557
0.777	0.053368
0.778	0.052814
0.778	0.053766
0.779	0.054661
0.78	0.055022
0.78	0.055752
0.781	0.05562
0.782	0.055173
0.782	0.054047
0.783	0.052569
0.784	0.051606
0.784	0.050448
0.785	0.049162
0.786	0.04808
0.786	0.047245
0.787	0.046552
0.788	0.046343
0.788	0.046497
0.789	0.046204
0.79	0.045759
0.79	0.045824
0.791	0.044791
0.792	0.044501
0.792	0.044423
0.793	0.042989
0.794	0.043234
0.794	0.043241
0.795	0.042771
0.796	0.041732
0.796	0.040238
0.797	0.039794
0.798	0.038686
0.798	0.038284
0.799	0.03825
0.8	0.037627
0.8	0.036745
0.801	0.035809
0.802	0.035388
0.802	0.035287
0.803	0.03509
0.804	0.034658
0.804	0.034528
0.805	0.034587
0.806	0.034696
0.806	0.034816
0.807	0.035359
0.808	0.035702
0.808	0.035369
0.809	0.035133
0.81	0.035561
0.81	0.036083
0.811	0.035139
0.812	0.034677
0.812	0.034254
0.813	0.033477
0.814	0.032444
0.814	0.032572
0.815	0.032114
0.816	0.031875
0.816	0.031959
0.817	0.03127
0.818	0.032073
0.818	0.033293
0.819	0.034382
0.82	0.034872
0.82	0.034355
0.821	0.03314
0.822	0.032381
0.822	0.032221
0.823	0.032211
0.824	0.03187
0.824	0.032759
0.825	0.033514
0.826	0.033743
0.826	0.033836
0.827	0.034267
0.828	0.034418
0.828	0.035238
0.829	0.035306
0.83	0.034806
0.83	0.034273
0.831	0.034219
0.832	0.034919
0.832	0.03515
0.833	0.034836
0.834	0.034354
0.834	0.034793
0.835	0.034373
0.836	0.033983
0.836	0.033746
0.837	0.03374
0.838	0.034094
0.838	0.034437
0.839	0.035238
0.84	0.035545
0.84	0.035178
0.841	0.035004
0.842	0.035621
0.842	0.035601
0.843	0.035936
0.844	0.036687
0.844	0.035855
0.845	0.035543
0.846	0.034892
0.846	0.033547
0.847	0.032326
0.848	0.031887
0.848	0.031407
0.849	0.030574
0.85	0.0296
0.85	0.029427
0.851	0.029101
0.852	0.028709
0.852	0.028543
0.853	0.028546
0.854	0.028291
0.854	0.028663
0.855	0.028429
0.856	0.028143
0.856	0.028068
0.857	0.028194
0.858	0.027775
0.858	0.027757
0.859	0.028242
0.86	0.028437
0.86	0.027214
0.861	0.025473
0.862	0.02434
0.862	0.023534
0.863	0.022791
0.864	0.021969
0.864	0.022017
0.865	0.022522
0.866	0.022303
0.866	0.021726
0.867	0.021613
0.868	0.022832
0.868	0.022912
0.869	0.022301
0.87	0.021625
0.87	0.021371
0.871	0.021437
0.872	0.020638
0.872	0.020784
0.873	0.020624
0.874	0.019566
0.875	0.019741
0.875	0.019937
0.876	0.019497
0.877	0.018459
0.877	0.01758
0.878	0.018792
0.879	0.01933
0.879	0.020131
0.88	0.020745
0.881	0.020965
0.881	0.020929
0.882	0.02152
0.883	0.022383
0.883	0.023062
0.884	0.023477
0.885	0.023856
0.885	0.02277
0.886	0.022666
0.887	0.023233
0.887	0.02397
0.888	0.024306
0.889	0.024342
0.889	0.024838
0.89	0.025101
0.891	0.025497
0.891	0.02653
0.892	0.02571
0.893	0.026629
0.893	0.026907
0.894	0.026721
0.895	0.026789
0.895	0.026381
0.896	0.026614
0.897	0.027098
0.897	0.027505
0.898	0.027334
0.899	0.027145
0.899	0.027208
0.9	0.027165
0.901	0.026487
0.901	0.026104
0.902	0.02618
0.903	0.027092
0.903	0.028134
0.904	0.028425
0.905	0.028431
0.905	0.029304
0.906	0.029822
0.907	0.029656
0.907	0.029105
0.908	0.030126
0.909	0.030106
0.909	0.029423
0.91	0.02916
0.911	0.030019
0.911	0.03136
0.912	0.03054
0.913	0.030139
0.913	0.030376
0.914	0.030623
0.915	0.029007
0.915	0.030691
0.916	0.03075
0.917	0.03033
0.917	0.030424
0.918	0.031147
0.919	0.032076
0.919	0.031169
0.92	0.029913
0.921	0.028945
0.921	0.027894
0.922	0.026248
0.923	0.025886
0.923	0.025746
0.924	0.025269
0.925	0.024364
0.925	0.023816
0.926	0.023391
0.927	0.023123
0.927	0.023137
0.928	0.023524
0.929	0.023452
0.929	0.023321
0.93	0.023513
0.931	0.023749
0.931	0.023551
0.932	0.02305
0.933	0.022763
0.933	0.02276
0.934	0.022482
0.935	0.021478
0.935	0.020562
0.936	0.019791
0.937	0.019187
0.937	0.018584
0.938	0.017773
0.939	0.016483
0.939	0.016018
0.94	0.015098
0.941	0.013853
0.941	0.012756
0.942	0.012643
0.943	0.011445
0.943	0.010226
0.944	0.009055
0.945	0.008013
0.945	0.007307
0.946	0.007789
0.947	0.008051
0.947	0.007971
0.948	0.007847
0.949	0.008365
0.949	0.008023
0.95	0.008
0.951	0.008256
0.951	0.008797
0.952	0.008481
0.953	0.007406
0.953	0.007279
0.954	0.008441
0.955	0.008477
0.955	0.008946
0.956	0.010042
0.957	0.010423
0.957	0.01005
0.958	0.010694
0.959	0.010954
0.959	0.010854
0.96	0.010461
0.961	0.01008
0.961	0.010232
0.962	0.010776
0.963	0.011072
0.963	0.012007
0.964	0.013073
0.965	0.012915
0.965	0.012332
0.966	0.012436
0.967	0.012845
0.967	0.013167
0.968	0.013062
0.969	0.013074
0.969	0.013429
0.97	0.013746
0.971	0.014005
0.971	0.014185
0.972	0.013419
0.973	0.013479
0.973	0.013364
0.974	0.013087
0.975	0.012931
0.975	0.013235
0.976	0.013184
0.977	0.013667
0.977	0.014382
0.978	0.015003
0.979	0.015747
0.979	0.016418
0.98	0.017444
0.981	0.018335
0.981	0.019021
0.982	0.02062
0.983	0.022007
0.983	0.022994
0.984	0.02339
0.985	0.023741
0.985	0.025595
0.986	0.026445
0.987	0.027464
0.987	0.028355
0.988	0.028885
0.989	0.028959
0.989	0.030433
0.99	0.030691
0.991	0.030903
0.991	0.031395
0.992	0.031796
0.993	0.030871
0.993	0.030381
0.994	0.030507
0.995	0.030264
0.995	0.02849
0.996	0.029081
0.997	0.028748
0.997	0.028007
0.998	0.027424
0.999	0.027531
0.999	0.028432
1	0.028702
1.001	0.029253
1.001	0.030274
1.002	0.031522
1.003	0.031681
1.003	0.031622
1.004	0.03157
1.005	0.03145
1.005	0.030346
1.006	0.030518
1.007	0.030877
1.007	0.031362
1.008	0.031958
1.009	0.031241
1.009	0.030329
1.01	0.029666
1.011	0.035298
1.011	0.036884
1.012	0.038037
1.013	0.04003
1.013	0.042806
1.014	0.04301
1.015	0.043434
1.015	0.043394
1.016	0.043714
1.017	0.043992
1.017	0.044876
1.018	0.045889
1.019	0.046428
1.019	0.047416
1.02	0.049097
1.021	0.04986
1.021	0.05061
1.022	0.049803
1.023	0.048654
1.023	0.048037
1.024	0.047891
1.025	0.04831
1.025	0.047159
1.026	0.047147
1.027	0.048528
1.027	0.048501
1.028	0.047424
1.029	0.049208
1.029	0.048645
1.03	0.048344
1.031	0.046282
1.031	0.0461
1.032	0.045799
1.033	0.044381
1.033	0.041212
1.034	0.039517
1.035	0.038787
1.035	0.038154
1.036	0.036982
1.037	0.036263
1.037	0.033725
1.038	0.030292
1.039	0.029134
1.039	0.028112
1.04	0.027507
1.041	0.024853
1.041	0.02394
1.042	0.022361
1.043	0.021505
1.043	0.023118
1.044	0.024173
1.045	0.023771
1.045	0.022935
1.046	0.022325
1.047	0.021234
1.047	0.023416
1.048	0.024887
1.049	0.024904
1.049	0.025422
1.05	0.026921
1.051	0.029012
1.051	0.028599
1.052	0.028195
1.053	0.030089
1.053	0.030212
1.054	0.029266
1.055	0.030441
1.055	0.032338
1.056	0.034011
1.057	0.035107
1.057	0.036343
1.058	0.037563
1.059	0.03932
1.059	0.039954
1.06	0.039264
1.061	0.039704
1.061	0.039146
1.062	0.03974
1.063	0.042212
1.063	0.043679
1.064	0.043053
1.065	0.042583
1.065	0.043943
1.066	0.044842
1.067	0.045431
1.067	0.045479
1.068	0.04662
1.069	0.046242
1.069	0.046006
1.07	0.046926
1.071	0.046593
1.071	0.046825
1.072	0.0479
1.073	0.047449
1.073	0.047921
1.074	0.048218
1.075	0.048759
1.075	0.049728
1.076	0.050242
1.077	0.049601
1.077	0.049461
1.078	0.049648
1.079	0.051763
1.079	0.051924
1.08	0.051011
1.081	0.050806
1.081	0.049324
1.082	0.050854
1.083	0.051887
1.083	0.052231
1.084	0.052322
1.085	0.053566
1.085	0.055066
1.086	0.055619
1.087	0.056979
1.087	0.055161
1.088	0.053751
1.089	0.053344
1.09	0.052967
1.09	0.052225
1.091	0.05141
1.092	0.050315
1.092	0.050208
1.093	0.049652
1.094	0.047343
1.094	0.048377
1.095	0.048482
1.096	0.048088
1.096	0.047519
1.097	0.04596
1.098	0.046046
1.098	0.045586
1.099	0.045703
1.1	0.043924
1.1	0.043108
1.101	0.042659
1.102	0.043395
1.102	0.043166
1.103	0.042294
1.104	0.040786
1.104	0.040205
1.105	0.040954
1.106	0.039468
1.106	0.040565
1.107	0.038435
1.108	0.036199
1.108	0.035439
1.109	0.034901
1.11	0.033863
1.11	0.031298
1.111	0.030649
1.112	0.029448
1.112	0.028351
1.113	0.028557
1.114	0.028994
1.114	0.02857
1.115	0.028723
1.116	0.029763
1.116	0.030577
1.117	0.030522
1.118	0.030564
1.118	0.031072
1.119	0.032941
1.12	0.031228
1.12	0.031282
1.121	0.032031
1.122	0.033276
1.122	0.032872
1.123	0.032281
1.124	0.031247
1.124	0.031773
1.125	0.032905
1.126	0.032974
1.126	0.031927
1.127	0.030774
1.128	0.030794
1.128	0.031301
1.129	0.030702
1.13	0.030758
1.13	0.030245
1.131	0.029797
1.132	0.028117
1.132	0.028071
1.133	0.028123
1.134	0.027729
1.134	0.026515
1.135	0.024665
1.136	0.023264
1.136	0.021838
1.137	0.021479
1.138	0.021795
1.138	0.0219
1.139	0.021026
1.14	0.020728
1.14	0.020166
1.141	0.019433
1.142	0.019863
1.142	0.019205
1.143	0.018558
1.144	0.0172
1.144	0.016333
1.145	0.016247
1.146	0.016235
1.146	0.014955
1.147	0.015015
1.148	0.014836
1.148	0.013727
1.149	0.012494
1.15	0.010346
1.15	0.007521
1.151	0.006769
1.152	0.007213
1.152	0.00854
1.153	0.008497
1.154	0.0097
1.154	0.009565
1.155	0.01104
1.156	0.01106
1.156	0.010272
1.157	0.011219
1.158	0.011972
1.158	0.012132
1.159	0.01272
1.16	0.014373
1.16	0.016844
1.161	0.017053
1.162	0.017538
1.162	0.017156
1.163	0.015203
1.164	0.01589
1.164	0.01627
1.165	0.017191
1.166	0.016894
1.166	0.017534
1.167	0.0177
1.168	0.01877
1.168	0.019348
1.169	0.020562
1.17	0.020403
1.17	0.020851
1.171	0.020506
1.172	0.020409
1.172	0.020593
1.173	0.022162
1.174	0.023823
1.174	0.024168
1.175	0.025523
1.176	0.026286
1.176	0.026636
1.177	0.027039
1.178	0.0263
1.178	0.025162
1.179	0.024812
1.18	0.02498
1.18	0.024426
1.181	0.024425
1.182	0.027222
1.182	0.027079
1.183	0.027279
1.184	0.027344
1.184	0.027826
1.185	0.029068
1.186	0.029649
1.186	0.030882
1.187	0.031711
1.188	0.033256
1.188	0.034651
1.189	0.035122
1.19	0.033789
1.19	0.032638
1.191	0.031902
1.192	0.030737
1.192	0.029178
1.193	0.027671
1.194	0.026895
1.194	0.027261
1.195	0.025865
1.196	0.02527
1.196	0.02546
1.197	0.02475
1.198	0.023568
1.198	0.02258
1.199	0.022752
1.2	0.022814
1.2	0.023208
1.201	0.023602
1.202	0.022949
1.202	0.021304
1.203	0.020884
1.204	0.02069
1.204	0.018716
1.205	0.018021
1.206	0.018716
1.206	0.018432
1.207	0.016361
1.208	0.015094
1.208	0.014482
1.209	0.014344
1.21	0.012702
1.21	0.011775
1.211	0.011635
1.212	0.010261
1.212	0.009458
1.213	0.009377
1.214	0.008713
1.214	0.009192
1.215	0.010485
1.216	0.010822
1.216	0.011422
1.217	0.012004
1.218	0.012769
1.218	0.013647
1.219	0.012351
1.22	0.012151
1.22	0.011969
1.221	0.011848
1.222	0.010359
1.222	0.010338
1.223	0.009888
1.224	0.009432
1.224	0.010534
1.225	0.009612
1.226	0.008502
1.226	0.008228
1.227	0.009037
1.228	0.011121
1.228	0.011347
1.229	0.012572
1.23	0.014109
1.23	0.013893
1.231	0.012376
1.232	0.011767
1.232	0.012407
1.233	0.012541
1.234	0.011984
1.234	0.010666
1.235	0.010424
1.236	0.009449
1.236	0.008696
1.237	0.009185
1.238	0.008124
1.238	0.007691
1.239	0.007569
1.24	0.007047
1.24	0.006502
1.241	0.007202
1.242	0.007215
1.242	0.007728
1.243	0.007193
1.244	0.007146
1.244	0.005971
1.245	0.006359
1.246	0.006076
1.246	0.007569
1.247	0.0076
1.248	0.007197
1.248	0.00817
1.249	0.007597
1.25	0.007152
1.25	0.007646
1.251	0.007078
1.252	0.006642
1.252	0.005296
1.253	0.005709
1.254	0.004897
1.254	0.004333
1.255	0.00505
1.256	0.006796
1.256	0.006858
1.257	0.007374
1.258	0.007349
1.258	0.00762
1.259	0.008812
1.26	0.010418
1.26	0.010801
1.261	0.010683
1.262	0.011105
1.262	0.011806
1.263	0.012641
1.264	0.012998
1.264	0.013937
1.265	0.016165
1.266	0.016478
1.266	0.016713
1.267	0.016413
1.268	0.017217
1.268	0.016996
1.269	0.018074
1.27	0.019213
1.27	0.019827
1.271	0.019449
1.272	0.020382
1.272	0.021041
1.273	0.022435
1.274	0.021875
1.274	0.022259
1.275	0.022868
1.276	0.022793
1.276	0.022936
1.277	0.022551
1.278	0.02229
1.278	0.02136
1.279	0.020481
1.28	0.019721
1.28	0.019761
1.281	0.019815
1.282	0.019692
1.282	0.019728
1.283	0.020572
1.284	0.020974
1.284	0.021957
1.285	0.022899
1.286	0.024438
1.286	0.024293
1.287	0.024042
1.288	0.024031
1.288	0.023607
1.289	0.023835
1.29	0.023903
1.29	0.023655
1.291	0.023326
1.292	0.023392
1.292	0.023311
1.293	0.023788
1.294	0.024343
1.294	0.023429
1.295	0.021981
1.296	0.022646
1.296	0.02275
1.297	0.022359
1.298	0.023737
1.298	0.023105
1.299	0.023068
1.3	0.024132
1.3	0.023864
1.301	0.022915
1.302	0.021931
1.302	0.022614
1.303	0.023574
1.304	0.02362
1.305	0.023289
1.305	0.023169
1.306	0.02279
1.307	0.023078
1.307	0.023537
1.308	0.02476
1.309	0.024883
1.309	0.024959
1.31	0.026114
1.311	0.02604
1.311	0.026571
1.312	0.027984
1.313	0.027963
1.313	0.029422
1.314	0.029382
1.315	0.029277
1.315	0.028814
1.316	0.029757
1.317	0.029589
1.317	0.029602
1.318	0.02912
1.319	0.029121
1.319	0.028742
1.32	0.030073
1.321	0.029651
1.321	0.029188
1.322	0.029887
1.323	0.030251
1.323	0.029723
1.324	0.029872
1.325	0.028873
1.325	0.028454
1.326	0.027665
1.327	0.026591
1.327	0.026272
1.328	0.026412
1.329	0.026243
1.329	0.025926
1.33	0.024219
1.331	0.024048
1.331	0.023697
1.332	0.023973
1.333	0.023597
1.333	0.021209
1.334	0.021038
[truncated: 38,325 more rows]
